# Supplementary material for: Home Visits and the Use of Routine and Emergency Postpartum Care Among Low-Income People: A Secondary Analysis of a Randomized Clinical Trial
Source: PubMed Central journal article supplement (PMC11667346; doi:10.1001/jamanetworkopen.2024.51605), 2024-12-23
Supplement: jamanetwopen-e2451605-s002.pdf [file jamanetwopen-e2451605-s002.pdf]

## Supplemental Online Content

Rokicki S, Oviedo D, Perreault N, et al. Home visits and the use of routine and emergency postpartum care among low-income people: a secondary analysis of a randomized clinical trial. *JAMA Netw Open*. 2024;7(12):e2451605. doi:10.1001/jamanetworkopen.2024.51605

**eFigure 1.** Participant Recruitment Flowchart

**eTable 1.** Sample and Variable Algorithms

**eTable 2.** Subgroup Definitions

**eTable 3.** Match Rates Between Treatment And Control

**eTable 4.** Percentage of Missing Values on Self-Reported Baseline Characteristics

**eTable 5.** Program Participation Stratified by Whether Postpartum Period Was Affected by COVID-19

**eTable 6.** Participation in Medicaid Home Visits at 12 Weeks Postpartum

**eTable 7.** Subgroup Treatment Effect Estimates

**eTable 8.** Multiple Imputation Results

**eTable 9.** Logistic Regression Results: Full Sample

**eTable 10.** Logistic Regression Results: Subgroups

This supplemental material has been provided by the authors to give readers additional information about their work.

**eFigure 1. Participant Recruitment Flowchart**

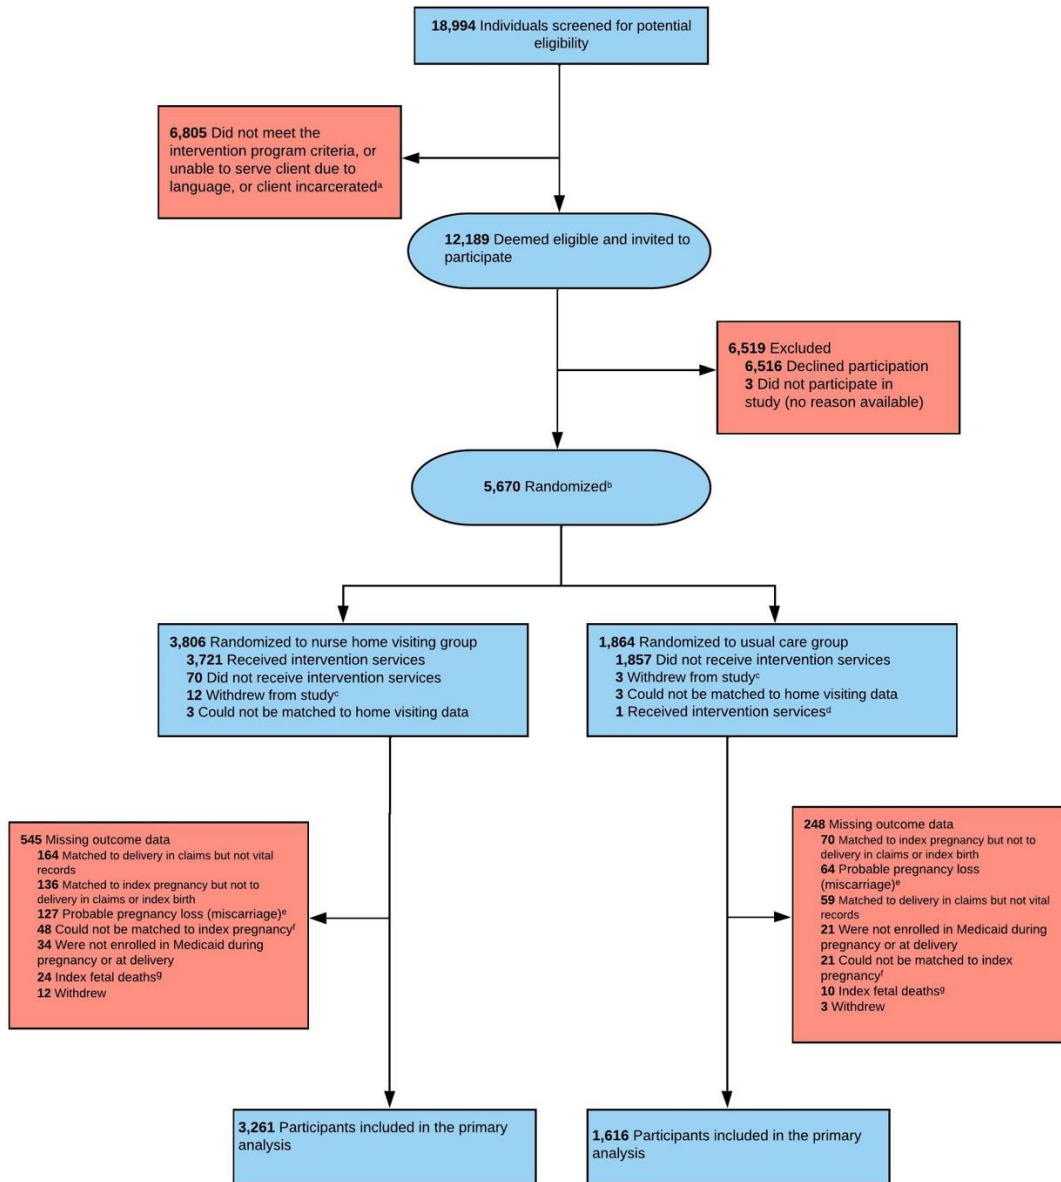

<sup>a</sup>The reasons participants were deemed ineligible were not systematically documented and so cannot be reported.

<sup>b</sup>Randomized in a 2:1 ratio to receive program services (intervention) or control, without stratification.

<sup>c</sup>Participation in the program was not recorded for participants who withdrew from the study.

<sup>d</sup>Participant may have received intervention services. Participant matched to a record in the Maternal, Infant, and Early Childhood Home Visiting program, indicating participation in the intervention program, but did not match to internal program records.

<sup>e</sup>Probable pregnancy loss was defined as having a diagnosis code for spontaneous abortion, ectopic pregnancy, or molar pregnancy in hospital discharge records or Medicaid claims within the expected delivery date and 42 weeks prior.

<sup>f</sup>Index pregnancy was defined as having at least 1 of the following: an index birth or fetal death, an indication of delivery in hospital discharge records or Medicaid claims within 120 days of the expected delivery date, a probable pregnancy loss in hospital discharge records or Medicaid claims, an antenatal care visit in Medicaid claims, or enrollment in Medicaid within the expected delivery date and 42 weeks prior.

<sup>g</sup>Index births were defined as matched births that appear in South Carolina vital records birth certificates within 120 days of the expected delivery date of the participant reported on the baseline survey.

**eTable 1. Sample and variable algorithms**

| Algorithm                          | Definition                                                                                                                                                                                                                                                                                                                                                                                                                                                                                                                                                                                                                                                                                                                                                                                                                                                                                                                                                                                                                                                                                                                                                                                                                                                                                                                                                                                                                                                                                                                                       |
|------------------------------------|--------------------------------------------------------------------------------------------------------------------------------------------------------------------------------------------------------------------------------------------------------------------------------------------------------------------------------------------------------------------------------------------------------------------------------------------------------------------------------------------------------------------------------------------------------------------------------------------------------------------------------------------------------------------------------------------------------------------------------------------------------------------------------------------------------------------------------------------------------------------------------------------------------------------------------------------------------------------------------------------------------------------------------------------------------------------------------------------------------------------------------------------------------------------------------------------------------------------------------------------------------------------------------------------------------------------------------------------------------------------------------------------------------------------------------------------------------------------------------------------------------------------------------------------------|
| Sample selection                   | Participants with an “index” live birth in matched vital records within 120 days of the expected delivery date reported on the baseline survey and who were enrolled in Medicaid either during pregnancy or at delivery                                                                                                                                                                                                                                                                                                                                                                                                                                                                                                                                                                                                                                                                                                                                                                                                                                                                                                                                                                                                                                                                                                                                                                                                                                                                                                                          |
| Outcome study period               | We include all claims that took place after the delivery discharge date and the first 12 weeks postpartum (for the 12 week outcomes) and between delivery discharge date and 1 year postpartum (for 1 year outcomes).                                                                                                                                                                                                                                                                                                                                                                                                                                                                                                                                                                                                                                                                                                                                                                                                                                                                                                                                                                                                                                                                                                                                                                                                                                                                                                                            |
| ED emergent and nonemergent visits | <p>Using the NYU ED patch algorithm, each ICD discharge code is assigned a probability of belonging to the following categories: emergent ED care needed not preventable/avoidable; emergent ED care needed preventable/avoidable; emergent, primary care treatable; non-emergent.</p> <p>Separate categories classify visits for injury, mental health, alcohol, and drug-related diagnoses, and unclassified. These were not used in our analyses.</p> <p>We took the sum of these assigned probabilities to create two composite categories: emergent and non-emergent. The emergent category is the sum of the probabilities of the “emergent ED care needed not preventable/avoidable” and “emergent ED care needed preventable/avoidable” categories. The non-emergent category is the sum of the probabilities of the “emergent, primary care treatable” and “non-emergent” categories.</p> <p>Since there are individuals with multiple observations per ED visit with differing ICD codes, we keep the maximum probability assigned to each category for that visit.</p> <p>If any of the visits are assigned a &gt;50% of being emergent, we call that visit emergent, if not, and it is assigned a &gt;50% probability of being non-emergent, we call it non-emergent.</p> <p>We then aggregate to the individual-level, taking the total number of emergent and non-emergent visits. Last, we create a binary variable indicating whether a mom had any emergent or any non-emergent visit as identified by the patch algorithm.</p> |

**eTable 2. Subgroup definitions**

| Subgroup                            | Definition                                                                                                                                                                                                                                                                                                                                                                                                                                                                                                                                                                                                                                                                                                                                                                                                                                                    |
|-------------------------------------|---------------------------------------------------------------------------------------------------------------------------------------------------------------------------------------------------------------------------------------------------------------------------------------------------------------------------------------------------------------------------------------------------------------------------------------------------------------------------------------------------------------------------------------------------------------------------------------------------------------------------------------------------------------------------------------------------------------------------------------------------------------------------------------------------------------------------------------------------------------|
| Cesarean                            | <p>Cesarean section - binary variable indicating cesarean section (final route)</p> <p>Source: First check vital records (VR). If missing, any claim from discharge data. If missing, any claim from Medicaid data.</p> <p>ICD codes: 10D00Z0, 10D00Z1, 10D00Z2</p> <p>HCPCS codes: 59510, 59514, 59515, 59618, 59620, 59622</p>                                                                                                                                                                                                                                                                                                                                                                                                                                                                                                                              |
| Chronic                             | <ul style="list-style-type: none"> <li>• Asthma J45</li> <li>• Hypertension I10, I11, I12, I13, I15, I674, N262</li> <li>• Mood or anxiety disorders F30, F31, F32, F33, F34, F39, F40, F41, F42, F43, F44, F45, F48</li> <li>• Diabetes (type 1, 2 or other) E10, E11, E13, Z9641, Z4681, T85614A, T85624A, T85633A, T85694A</li> </ul> <p>Source: claims</p>                                                                                                                                                                                                                                                                                                                                                                                                                                                                                                |
| Complications                       | <p>Complex pregnancy or delivery (source and ICD codes):</p> <ul style="list-style-type: none"> <li>• Placenta previa (claims) O440, O441, O730</li> <li>• preterm labor (VR + claims) O60</li> <li>• gestational diabetes (VR + claims) O9981, O244</li> <li>• gestational hypertension (VR + claims) O12, O13, O16</li> <li>• preeclampsia (claims) O14, O15</li> <li>• multiple gestation (VR + claims) Z372, Z373, Z374, Z375, Z376, Z377, O30</li> <li>• hemorrhage (claims) D6959, O9903, O9913, O72, O721, O722, O723, O730, O731, I976</li> <li>• infection (claims) O239, O8689, O864, T8579XA, T827XXA</li> <li>• laceration (claims) O702, O703, O709, O717, O704, O7182, O719, O713, O714, O901</li> <li>• operative injury (claims) O754, T81509A, T81519A, T81529A, T81539A, T80919A,</li> <li>• uterine rupture (claims) O710, O711</li> </ul> |
| Pre-covid                           | <p>Mom experienced the period of delivery date-12 weeks postpartum before March 23, 2020.</p>                                                                                                                                                                                                                                                                                                                                                                                                                                                                                                                                                                                                                                                                                                                                                                 |
| Participants facing vulnerabilities | <p>Socially vulnerable mothers are those with education less than high school diploma or GED, &lt;19 years old, or mental health flag (PHQ-2 score <math>\geq 2</math> or receipt of mental health treatment in previous year).</p>                                                                                                                                                                                                                                                                                                                                                                                                                                                                                                                                                                                                                           |
| Non-Hispanic Black                  | <p>Self-reported race and ethnicity as non-Hispanic Black</p>                                                                                                                                                                                                                                                                                                                                                                                                                                                                                                                                                                                                                                                                                                                                                                                                 |

**eTable 3. Match rates between treatment and control**

|                                                                                                                                              | Usual care group  | Nurse Home Visiting Group | Percentage point difference (SE) | p-value <sup>a</sup> |
|----------------------------------------------------------------------------------------------------------------------------------------------|-------------------|---------------------------|----------------------------------|----------------------|
| Index birth indicator - mother has a baby with matched VR within 120 days of EDD                                                             | 1637/1861 (88.0%) | 3295/3794 (86.8%)         | 1.1 (0.9)                        | 0.24                 |
| Matched to VR index birth & Medicaid eligibility file                                                                                        | 1621/1861 (87.1%) | 3277/3794 (86.4%)         | 0.7 (1)                          | 0.45                 |
| Matched to VR index birth & had Medicaid during pregnancy or at delivery [Analytical sample]                                                 | 1616/1861 (86.8%) | 3261/3794 (86%)           | 0.9 (1)                          | 0.36                 |
| Matched to VR index birth & had Medicaid continuously for 60 days postpartum                                                                 | 1530/1861 (82.2%) | 3095/3794 (81.6%)         | 0.6 (1.1)                        | 0.56                 |
| Matched to VR index birth & had Medicaid continuously for 1 year postpartum                                                                  | 901/1861 (48.4%)  | 1810/3794 (47.7%)         | 0.7 (1.4)                        | 0.62                 |
| Matched to VR index birth & had Medicaid during pregnancy or delivery & had at least one day affected by pandemic in the 12 weeks postpartum | 307/1616 (19.0%)  | 597/3261 (18.31%)         | 0.7 (1.2)                        | 0.56                 |

Notes: Sample is all N=5655 enrolled mothers (n=1861 in control, n=3794 in treatment). VR=vital records. <sup>a</sup>P-values for the t-test were calculated using a two-tailed test. A significance level of  $\alpha = 0.05$  was used to determine statistical significance.

**eTable 4. Percentage of Missing values on Self-reported Baseline Characteristics**

|                                                                      | Total           | Nurse Home Visiting Group | Usual Care Group |
|----------------------------------------------------------------------|-----------------|---------------------------|------------------|
| Characteristics                                                      | (N=4877)        | (N = 3261)                | (N = 1616)       |
| Race/ethnicity                                                       | 299/4877 (6.1%) | 187/3261 (5.7%)           | 112/1616 (6.9%)  |
| Reported interacting with the father of the child daily              | 21/4877 (0.4%)  | 14/3261 (0.4%)            | 7/1616 (0.4%)    |
| Highest education level                                              | 20/4877 (0.4%)  | 14/3261 (0.4%)            | 6/1616 (0.4%)    |
| Working for pay                                                      | 2/4877 (0.0%)   | 1/3261 (0.0%)             | 1/1616 (0.1%)    |
| Receiving one or more social service programs                        | 101/4877 (2.1%) | 64/3261 (2.0%)            | 37/1616 (2.3%)   |
| Housing insecurity                                                   | 9/4877 (0.2%)   | 5/3261 (0.2%)             | 4/1616 (0.2%)    |
| Currently lives with parents                                         | 4/4877 (0.1%)   | 2/3261 (0.1%)             | 2/1616 (0.1%)    |
| Received at least one antenatal care visit before time of survey (%) | 57/4877 (1.2%)  | 37/3261 (1.1%)            | 20/1616 (1.2%)   |
| Used hospital emergency room in past six months                      | 3/4877 (0.1%)   | 0/3261 (0.0%)             | 3/1616 (0.2%)    |
| Received mental health treatment in last year                        | 8/4877 (0.2%)   | 3/3261 (0.1%)             | 5/1616 (0.3%)    |
| Reported drinking alcohol in the three months before pregnancy       | 28/4877 (0.6%)  | 16/3261 (0.5%)            | 12/1616 (0.7%)   |
| Reported smoking cigarettes in the three months before pregnancy     | 69/4877 (1.4%)  | 49/3261 (1.5%)            | 20/1616 (1.2%)   |
| Depressive symptoms (PHQ-2 $\geq$ 3)                                 | 31/4877 (0.6%)  | 25/3261 (0.8%)            | 6/1616 (0.4%)    |
| High stress (Perceived Stress Scale-4 $\geq$ 4)                      | 66/4877 (1.4%)  | 44/3261 (1.3%)            | 22/1616 (1.4%)   |
| Health self-reported as fair/poor                                    | 23/4877 (0.5%)  | 17/3261 (0.5%)            | 6/1616 (0.4%)    |
| Body Mass Index (BMI)                                                | 159/4877 (3.3%) | 97/3261 (3.0%)            | 62/1616 (3.8%)   |
| Has access to a place for family planning or birth control           | 10/4877 (0.2%)  | 6/3261 (0.2%)             | 4/1616 (0.2%)    |
| Reported a desire for more children in the future                    | 1/4877 (0.0%)   | 0/3261 (0.0%)             | 1/1616 (0.1%)    |

**eTable 5. Program participation stratified by whether postpartum period was affected by COVID-19**

|                                                                 | 12 weeks postpartum   |                      |                       | 1 year postpartum     |                      |                       |
|-----------------------------------------------------------------|-----------------------|----------------------|-----------------------|-----------------------|----------------------|-----------------------|
|                                                                 | Covid Unaffected      | Covid Affected       | Full Sample           | Covid Unaffected      | Covid Affected       | Full Sample           |
| <b>Extent of participation</b>                                  |                       |                      |                       |                       |                      |                       |
| At least one completed home visit                               | 2031/2664<br>(76.2%)  | 449/597<br>(75.2%)   | 2480/3261<br>(76.1%)  | 1549/2034<br>(76.2%)  | 948/1227<br>(77.3%)  | 2497/3261<br>(76.6%)  |
| At least one completed in-person home visit                     | 2022/2664<br>(75.9%)  | 165/597<br>(27.6%)   | 2187/3261<br>(67.1%)  | 1547/2034<br>(76.1%)  | 695/1227<br>(56.6%)  | 2242/3261<br>(68.8%)  |
| At least one completed telehealth home visit                    | 471/2664<br>(17.7%)   | 435/597<br>(72.9%)   | 906/3261<br>(27.8%)   | 563/2034<br>(27.7%)   | 879/1227<br>(71.6%)  | 1442/3261<br>(44.2%)  |
| At least one Medicaid home visit                                | 192/2664<br>(7.2%)    | 10/597<br>(1.7%)     | 202/3261<br>(6.2%)    | 145/2034<br>(7.1%)    | 60/1227<br>(4.9%)    | 205/3261<br>(6.3%)    |
| Number of completed home visits                                 | 4.5 (3.4)             | 4.7 (4.1)            | 4.6 (3.5)             | 12.3 (10.2)           | 13.9 (12.1)          | 12.9 (11)             |
| Number of completed in-person home visits                       | 4.2 (3.1)             | 0.9 (1.8)            | 3.6 (3.2)             | 11.5 (9.5)            | 4.8 (6)              | 9 (9)                 |
| Number of completed telehealth home visits                      | 0.3 (1)               | 3.9 (3.7)            | 1 (2.3)               | 0.8 (2.1)             | 9.2 (9.3)            | 4 (7.2)               |
| Home visit duration <sup>a</sup>                                | 66.6 (30.6, N = 2031) | 41.3 (18.8, N = 449) | 62 (30.4, N = 2480)   | 65.2 (28, N = 1549)   | 46.3 (17.8, N = 948) | 58 (26.3, N = 2497)   |
| In-person home visit duration <sup>a</sup>                      | 69.8 (32.1, N = 2022) | 61.9 (30.4, N = 165) | 69.2 (32.1, N = 2187) | 67.9 (28.1, N = 1547) | 63.9 (19.6, N = 694) | 66.7 (25.8, N = 2241) |
| Telehealth home visit duration <sup>a</sup>                     | 23.1 (13, N = 471)    | 35.1 (16.4, N = 435) | 28.9 (15.9, N = 906)  | 22.3 (13.1, N = 563)  | 34.2 (14.2, N = 879) | 29.6 (14.9, N = 1442) |
| <b>Length of NFP participation</b>                              |                       |                      |                       |                       |                      |                       |
| Home visits continued to within 14 days of 12th week postpartum | 1805/2664<br>(67.8%)  | 417/597<br>(69.8%)   | 2222/3261<br>(68.1%)  |                       |                      |                       |
| Home visits continued to within 14 days of 1st year postpartum  | 1015/2034<br>(49.9%)  | 697/1227<br>(56.8%)  | 1712/3261<br>(52.5%)  |                       |                      |                       |

Notes: Sample is mothers with an index birth and Medicaid coverage any time during pregnancy and birth COVID-19 unaffected defined as those who experienced pregnancy-12 weeks postpartum before March 23, 2020. Visit-level data are aggregated at the individual participant level prior to analysis.

<sup>a</sup>Program metrics on duration of visit are reported for participants with at least one home visit in the specified postpartum period.



**eTable 6. Participation in Medicaid home visits at 12 weeks postpartum**

|                                          | <b>Nurse Home Visiting Group</b> | <b>Usual Care Group</b> |
|------------------------------------------|----------------------------------|-------------------------|
| At least one Medicaid home visit [N (%)] | 202/3261 (6.2%)                  | 182/1616 (11.3%)        |

**eTable 7. Subgroup treatment effect estimates**

|                                                           | <b>Nurse Home Visiting Group</b> | <b>Usual Care Group</b> | <b>Unadjusted Between-Group Difference (95% CI)</b> | <b>Adjusted Between-Group Difference (95% CI)</b> |
|-----------------------------------------------------------|----------------------------------|-------------------------|-----------------------------------------------------|---------------------------------------------------|
| <b>Panel A. Cesarean subgroup (n=1,531)</b>               |                                  |                         |                                                     |                                                   |
| Routine postpartum follow-up                              | 648/1011 (64.1%)                 | 329/520 (63.3%)         | 0.8 (-4.3, 5.9)                                     | 0.5 (-4.6, 5.6)                                   |
| At least one outpatient visit not PP check                | 29/1011 (2.9%)                   | 9/520 (1.7%)            | 1.1 (-0.5, 2.8)                                     | 1.3 (-0.4, 3)                                     |
| At least one emergency department visit without admission | 222/1011 (22%)                   | 125/520 (24%)           | -2.1 (-6.5, 2.4)                                    | -1.7 (-6.1, 2.8)                                  |
| At least one hospitalization                              | 52/1011 (5.1%)                   | 25/520 (4.8%)           | 0.3 (-2, 2.7)                                       | 0.2 (-2.2, 2.5)                                   |
| ED visit (emergent)                                       | 29/1011 (2.9%)                   | 19/520 (3.7%)           | -0.8 (-2.6, 1.1)                                    | -1.1 (-2.9, 0.8)                                  |
| ED visit (non-emergent, primary care treatable)           | 110/1011 (10.9%)                 | 69/520 (13.3%)          | -2.4 (-5.8, 1)                                      | -1.8 (-5.2, 1.6)                                  |
| <b>Panel B. Chronic disease subgroup (n=2,022)</b>        |                                  |                         |                                                     |                                                   |
| Routine postpartum follow-up                              | 917/1357 (67.6%)                 | 451/665 (67.8%)         | -0.2 (-4.6, 4.1)                                    | -0.2 (-4.6, 4.2)                                  |
| At least one outpatient visit not PP check                | 45/1357 (3.3%)                   | 23/665 (3.5%)           | -0.1 (-1.8, 1.5)                                    | 0 (-1.7, 1.8)                                     |
| At least one emergency department visit without admission | 329/1357 (24.2%)                 | 160/665 (24.1%)         | 0.2 (-3.8, 4.2)                                     | -0.5 (-4.5, 3.5)                                  |
| At least one hospitalization                              | 69/1357 (5.1%)                   | 23/665 (3.5%)           | 1.6 (-0.3, 3.6)*                                    | 1.2 (-0.8, 3.2)                                   |
| ED visit (emergent)                                       | 49/1357 (3.6%)                   | 21/665 (3.2%)           | 0.5 (-1.2, 2.2)                                     | 0.3 (-1.5, 2)                                     |
| ED visit (non-emergent, primary care treatable)           | 175/1357 (12.9%)                 | 92/665 (13.8%)          | -0.9 (-4.1, 2.2)                                    | -1.2 (-4.4, 1.9)                                  |
| <b>Panel C. Complications subgroup (n=3,019)</b>          |                                  |                         |                                                     |                                                   |
| Routine postpartum follow-up                              | 1287/2016 (63.8%)                | 639/1003 (63.7%)        | 0.1 (-3.5, 3.8)                                     | 0.4 (-3.2, 4.1)                                   |
| At least one outpatient visit not PP check                | 58/2016 (2.9%)                   | 25/1003 (2.5%)          | 0.4 (-0.9, 1.6)                                     | 0.5 (-0.7, 1.8)                                   |
| At least one emergency department visit without admission | 408/2016 (20.2%)                 | 211/1003 (21%)          | -0.8 (-3.9, 2.3)                                    | -0.9 (-3.9, 2.1)                                  |
| At least one hospitalization                              | 94/2016 (4.7%)                   | 32/1003 (3.2%)          | 1.5 (0, 3)*                                         | 1.4 (-0.1, 3)*                                    |
| ED visit (emergent)                                       | 75/2016 (3.7%)                   | 30/1003 (3%)            | 0.7 (-0.7, 2.1)                                     | 0.6 (-0.8, 2)                                     |
| ED visit (non-emergent, primary care treatable)           | 212/2016 (10.5%)                 | 122/1003 (12.2%)        | -1.6 (-4, 0.7)                                      | -1.5 (-3.9, 0.8)                                  |
| <b>Panel D. Pre-COVID subgroup (n=3,973)</b>              |                                  |                         |                                                     |                                                   |
| Routine postpartum follow-up                              | 1708/2664 (64.1%)                | 842/1309 (64.3%)        | -0.2 (-3.4, 3)                                      | 0.2 (-3, 3.4)                                     |
| At least one outpatient visit not PP check                | 75/2664 (2.8%)                   | 34/1309 (2.6%)          | 0.2 (-0.9, 1.3)                                     | 0.4 (-0.7, 1.5)                                   |
| At least one emergency department visit without admission | 516/2664 (19.4%)                 | 288/1309 (22%)          | -2.6 (-5.3, 0)*                                     | -2.9 (-5.5, -0.2)**                               |
| At least one hospitalization                              | 100/2664 (3.8%)                  | 44/1309 (3.4%)          | 0.4 (-0.8, 1.6)                                     | 0.3 (-0.9, 1.6)                                   |
| ED visit (emergent)                                       | 74/2664 (2.8%)                   | 37/1309 (2.8%)          | 0 (-1.1, 1)                                         | -0.2 (-1.2, 0.9)                                  |
| ED visit (non-emergent, primary care treatable)           | 278/2664 (10.4%)                 | 164/1309 (12.5%)        | -2.1 (-4.2, 0)**                                    | -2 (-4.1, 0.1)*                                   |

|                                                           |                   |                 |                  |                  |
|-----------------------------------------------------------|-------------------|-----------------|------------------|------------------|
| <b>Panel E. Vulnerable subgroup (n=2,269)</b>             |                   |                 |                  |                  |
| Routine postpartum follow-up                              | 977/1541 (63.4%)  | 455/728 (62.5%) | 0.9 (-3.4, 5.2)  | 0.3 (-3.9, 4.6)  |
| At least one outpatient visit not PP check                | 49/1541 (3.2%)    | 21/728 (2.9%)   | 0.3 (-1.2, 1.8)  | 0.3 (-1.2, 1.8)  |
| At least one emergency department visit without admission | 315/1541 (20.4%)  | 161/728 (22.1%) | -1.7 (-5.3, 1.9) | -2.2 (-5.8, 1.4) |
| At least one hospitalization                              | 64/1541 (4.2%)    | 23/728 (3.2%)   | 1 (-0.7, 2.7)    | 0.8 (-0.9, 2.5)  |
| ED visit (emergent)                                       | 50/1541 (3.2%)    | 20/728 (2.7%)   | 0.5 (-1, 2)      | 0.3 (-1.2, 1.8)  |
| ED visit (non-emergent, primary care treatable)           | 176/1541 (11.4%)  | 85/728 (11.7%)  | -0.3 (-3.1, 2.6) | -0.3 (-3.1, 2.5) |
| <b>Panel F. Non-Hispanic Black subgroup (n=2,535)</b>     |                   |                 |                  |                  |
| Routine postpartum follow-up                              | 1108/1697 (65.3%) | 551/838 (65.8%) | -0.5 (-4.4, 3.5) | -0.5 (-4.4, 3.5) |
| At least one outpatient visit not PP check                | 52/1697 (3.1%)    | 26/838 (3.1%)   | 0 (-1.5, 1.4)    | 0 (-1.5, 1.4)    |
| At least one emergency department visit without admission | 344/1697 (20.3%)  | 184/838 (22%)   | -1.7 (-5, 1.7)   | -2.2 (-5.5, 1.2) |
| At least one hospitalization                              | 62/1697 (3.7%)    | 26/838 (3.1%)   | 0.6 (-1, 2.1)    | 0.5 (-1, 2.1)    |
| ED visit (emergent)                                       | 48/1697 (2.8%)    | 21/838 (2.5%)   | 0.3 (-1, 1.7)    | 0.2 (-1.1, 1.6)  |
| ED visit (non-emergent, primary care treatable)           | 202/1697 (11.9%)  | 114/838 (13.6%) | -1.7 (-4.4, 1)   | -1.9 (-4.6, 0.8) |

**eTable 8. Multiple imputation results**

|                                                              | Nurse Home Visiting Group | Usual Care Group  | Unadjusted Between-Group Difference (95% CI) | Adjusted Between-Group Difference (95% CI) |
|--------------------------------------------------------------|---------------------------|-------------------|----------------------------------------------|--------------------------------------------|
| <b>12-week outcomes</b>                                      |                           |                   |                                              |                                            |
| Routine postpartum follow-up                                 | 2079/3261 (63.8%)         | 1038/1616 (64.2%) | -0.5 (-3.3, 2.4)                             | -0.2 (-3.3, 2.9)                           |
| At least one outpatient visit not PP check                   | 94/3261 (2.9%)            | 42/1616 (2.6%)    | 0.3 (-0.7, 1.3)                              | 0.6 (-0.5, 1.6)                            |
| At least one emergency department visit without admission    | 601/3261 (18.4%)          | 333/1616 (20.6%)  | -2.2 (-4.5, 0.2)*                            | -2.7 (-5.2, -0.1)**                        |
| At least one hospitalization                                 | 120/3261 (3.7%)           | 50/1616 (3.1%)    | 0.6 (-0.5, 1.7)                              | 0.8 (-0.4, 2)                              |
| ED visit (emergent) <sup>1</sup>                             | 92/3261 (2.8%)            | 44/1616 (2.7%)    | 0.1 (-0.9, 1.1)                              | 0.1 (-1, 1.2)                              |
| ED visit (non-emergent, primary care treatable) <sup>2</sup> | 317/3261 (9.7%)           | 186/1616 (11.5%)  | -1.8 (-3.6, 0)*                              | -1.6 (-3.5, 0.4)                           |
| <b>1-year outcomes</b>                                       |                           |                   |                                              |                                            |
| At least one outpatient visit not PP check                   | 353/3261 (10.8%)          | 164/1616 (10.1%)  | 0.7 (-1.2, 2.5)                              | 0.7 (-1.3, 2.7)                            |
| At least one emergency department visit without admission    | 1578/3261 (48.4%)         | 799/1616 (49.4%)  | -1.1 (-4, 1.9)                               | -1.5 (-4.6, 1.6)                           |
| At least one hospitalization                                 | 243/3261 (7.5%)           | 107/1616 (6.6%)   | 0.8 (-0.7, 2.4)                              | 1.1 (-0.5, 2.8)                            |
| ED visit (emergent) <sup>1</sup>                             | 289/3261 (8.9%)           | 143/1616 (8.8%)   | 0 (-1.7, 1.7)                                | 0 (-1.9, 1.9)                              |

**eTable 9. Logistic regression results – full sample**

|                                                              | <b>Nurse Home Visiting Group</b> | <b>Usual Care Group</b> | <b>Unadjusted Odds Ratios (95% CI)</b> | <b>Adjusted Odds Ratios (95% CI)</b> |
|--------------------------------------------------------------|----------------------------------|-------------------------|----------------------------------------|--------------------------------------|
| <b>12 week outcomes</b>                                      |                                  |                         |                                        |                                      |
| Routine postpartum follow-up                                 | 1708/2664 (64.1%)                | 842/1309 (64.3%)        | 0.99 (0.86, 1.14)                      | 1.01 (0.88, 1.16)                    |
| At least one outpatient visit not PP check                   | 75/2664 (2.8%)                   | 34/1309 (2.6%)          | 1.09 (0.72, 1.64)                      | 1.16 (0.76, 1.75)                    |
| At least one emergency department visit without admission    | 516/2664 (19.4%)                 | 288/1309 (22%)          | 0.85 (0.72, 1)*                        | 0.83 (0.7, 0.98)**                   |
| At least one hospitalization                                 | 100/2664 (3.8%)                  | 44/1309 (3.4%)          | 1.12 (0.78, 1.61)                      | 1.11 (0.77, 1.6)                     |
| ED visit (emergent) <sup>1</sup>                             | 74/2664 (2.8%)                   | 37/1309 (2.8%)          | 0.98 (0.66, 1.47)                      | 0.94 (0.62, 1.41)                    |
| ED visit (non-emergent, primary care treatable) <sup>2</sup> | 278/2664 (10.4%)                 | 164/1309 (12.5%)        | 0.81 (0.66, 1)**                       | 0.82 (0.66, 1.01)*                   |
| <b>1 year outcomes</b>                                       |                                  |                         |                                        |                                      |
| At least one outpatient visit not PP check                   | 252/2664 (9.5%)                  | 127/1309 (9.7%)         | 0.97 (0.78, 1.22)                      | 1.03 (0.82, 1.29)                    |
| At least one emergency department visit without admission    | 1321/2664 (49.6%)                | 656/1309 (50.1%)        | 0.98 (0.86, 1.12)                      | 0.98 (0.85, 1.13)                    |
| At least one hospitalization                                 | 207/2664 (7.8%)                  | 88/1309 (6.7%)          | 1.17 (0.9, 1.51)                       | 1.17 (0.9, 1.52)                     |
| ED visit (emergent) <sup>1</sup>                             | 234/2664 (8.8%)                  | 117/1309 (8.9%)         | 0.98 (0.78, 1.24)                      | 0.96 (0.76, 1.22)                    |
| ED visit (non-emergent, primary care treatable) <sup>2</sup> | 978/2664 (36.7%)                 | 484/1309 (37%)          | 0.99 (0.86, 1.13)                      | 0.99 (0.86, 1.15)                    |

**eTable 10. Logistic regression results – subgroups**

|                                                           | Nurse Home Visiting Group | Usual Care Group | Unadjusted Between-Group Difference (95% CI) | Adjusted Between-Group Difference (95% CI) |
|-----------------------------------------------------------|---------------------------|------------------|----------------------------------------------|--------------------------------------------|
| <b>Panel A. Cesarean subgroup (n=1,531)</b>               |                           |                  |                                              |                                            |
| Routine postpartum follow-up                              | 648/1011 (64.1%)          | 329/520 (63.3%)  | 1.04 (0.83, 1.29)                            | 1.02 (0.81, 1.29)                          |
| At least one outpatient visit not PP check                | 29/1011 (2.9%)            | 9/520 (1.7%)     | 1.7 (0.8, 3.6)                               | 1.8 (0.8, 4)                               |
| At least one emergency department visit without admission | 222/1011 (22%)            | 125/520 (24%)    | 0.9 (0.7, 1.1)                               | 0.9 (0.7, 1.2)                             |
| At least one hospitalization                              | 52/1011 (5.1%)            | 25/520 (4.8%)    | 1.1 (0.7, 1.8)                               | 1.1 (0.6, 1.8)                             |
| ED visit (emergent)                                       | 29/1011 (2.9%)            | 19/520 (3.7%)    | 0.8 (0.4, 1.4)                               | 0.7 (0.4, 1.3)                             |
| ED visit (non-emergent, primary care treatable)           | 110/1011 (10.9%)          | 69/520 (13.3%)   | 0.8 (0.6, 1.1)                               | 0.8 (0.6, 1.2)                             |
| <b>Panel B. Chronic disease subgroup (n=2,022)</b>        |                           |                  |                                              |                                            |
| Routine postpartum follow-up                              | 917/1357 (67.6%)          | 451/665 (67.8%)  | 0.99 (0.81, 1.21)                            | 0.99 (0.81, 1.21)                          |
| At least one outpatient visit not PP check                | 45/1357 (3.3%)            | 23/665 (3.5%)    | 0.96 (0.57, 1.6)                             | 1.03 (0.61, 1.75)                          |
| At least one emergency department visit without admission | 329/1357 (24.2%)          | 160/665 (24.1%)  | 1.01 (0.81, 1.25)                            | 0.97 (0.78, 1.22)                          |
| At least one hospitalization                              | 69/1357 (5.1%)            | 23/665 (3.5%)    | 1.5 (0.92, 2.42)                             | 1.34 (0.82, 2.2)                           |
| ED visit (emergent)                                       | 49/1357 (3.6%)            | 21/665 (3.2%)    | 1.15 (0.68, 1.93)                            | 1.1 (0.64, 1.9)                            |
| ED visit (non-emergent, primary care treatable)           | 175/1357 (12.9%)          | 92/665 (13.8%)   | 0.92 (0.7, 1.21)                             | 0.9 (0.68, 1.19)                           |
| <b>Panel C. Complications subgroup (n=3,019)</b>          |                           |                  |                                              |                                            |
| Routine postpartum follow-up                              | 1287/2016 (63.8%)         | 639/1003 (63.7%) | 1.01 (0.86, 1.18)                            | 1.02 (0.86, 1.2)                           |
| At least one outpatient visit not PP check                | 58/2016 (2.9%)            | 25/1003 (2.5%)   | 1.16 (0.72, 1.86)                            | 1.22 (0.75, 1.97)                          |
| At least one emergency department visit without admission | 408/2016 (20.2%)          | 211/1003 (21%)   | 0.95 (0.79, 1.15)                            | 0.94 (0.78, 1.14)                          |
| At least one hospitalization                              | 94/2016 (4.7%)            | 32/1003 (3.2%)   | 1.48 (0.99, 2.23)*                           | 1.46 (0.96, 2.21)*                         |
| ED visit (emergent)                                       | 75/2016 (3.7%)            | 30/1003 (3%)     | 1.25 (0.81, 1.93)                            | 1.22 (0.78, 1.89)                          |
| ED visit (non-emergent, primary care treatable)           | 212/2016 (10.5%)          | 122/1003 (12.2%) | 0.85 (0.67, 1.08)                            | 0.86 (0.67, 1.09)                          |
| <b>Panel D. Pre-COVID subgroup (n=3,973)</b>              |                           |                  |                                              |                                            |
| Routine postpartum follow-up                              | 1708/2664 (64.1%)         | 842/1309 (64.3%) | 0.99 (0.86, 1.14)                            | 1.01 (0.88, 1.16)                          |
| At least one outpatient visit not PP check                | 75/2664 (2.8%)            | 34/1309 (2.6%)   | 1.09 (0.72, 1.64)                            | 1.16 (0.76, 1.75)                          |
| At least one emergency department visit without admission | 516/2664 (19.4%)          | 288/1309 (22%)   | 0.85 (0.72, 1)*                              | 0.83 (0.7, 0.98)**                         |
| At least one hospitalization                              | 100/2664 (3.8%)           | 44/1309 (3.4%)   | 1.12 (0.78, 1.61)                            | 1.11 (0.77, 1.6)                           |
| ED visit (emergent)                                       | 74/2664 (2.8%)            | 37/1309 (2.8%)   | 0.98 (0.66, 1.47)                            | 0.94 (0.62, 1.41)                          |
| ED visit (non-emergent, primary care treatable)           | 278/2664 (10.4%)          | 164/1309 (12.5%) | 0.81 (0.66, 1)**                             | 0.82 (0.66, 1.01)*                         |

|                                                           |                   |                 |                   |                   |
|-----------------------------------------------------------|-------------------|-----------------|-------------------|-------------------|
| <b>Panel E. Vulnerable subgroup (n=2,269)</b>             |                   |                 |                   |                   |
| Routine postpartum follow-up                              | 977/1541 (63.4%)  | 455/728 (62.5%) | 1.04 (0.87, 1.25) | 1.02 (0.84, 1.23) |
| At least one outpatient visit not PP check                | 49/1541 (3.2%)    | 21/728 (2.9%)   | 1.11 (0.66, 1.86) | 1.12 (0.66, 1.91) |
| At least one emergency department visit without admission | 315/1541 (20.4%)  | 161/728 (22.1%) | 0.9 (0.73, 1.12)  | 0.87 (0.69, 1.08) |
| At least one hospitalization                              | 64/1541 (4.2%)    | 23/728 (3.2%)   | 1.33 (0.82, 2.16) | 1.28 (0.78, 2.12) |
| ED visit (emergent)                                       | 50/1541 (3.2%)    | 20/728 (2.7%)   | 1.19 (0.7, 2.01)  | 1.08 (0.63, 1.85) |
| ED visit (non-emergent, primary care treatable)           | 176/1541 (11.4%)  | 85/728 (11.7%)  | 0.98 (0.74, 1.28) | 0.98 (0.73, 1.3)  |
| <b>Panel F. Non-Hispanic Black subgroup (n=2,535)</b>     |                   |                 |                   |                   |
| Routine postpartum follow-up                              | 1108/1697 (65.3%) | 551/838 (65.8%) | 0.98 (0.82, 1.17) | 0.98 (0.82, 1.17) |
| At least one outpatient visit not PP check                | 52/1697 (3.1%)    | 26/838 (3.1%)   | 0.99 (0.61, 1.59) | 1.01 (0.62, 1.64) |
| At least one emergency department visit without admission | 344/1697 (20.3%)  | 184/838 (22%)   | 0.9 (0.74, 1.11)  | 0.88 (0.71, 1.08) |
| At least one hospitalization                              | 62/1697 (3.7%)    | 26/838 (3.1%)   | 1.18 (0.74, 1.89) | 1.14 (0.71, 1.83) |
| ED visit (emergent)                                       | 48/1697 (2.8%)    | 21/838 (2.5%)   | 1.13 (0.67, 1.9)  | 1.06 (0.62, 1.81) |
| ED visit (non-emergent, primary care treatable)           | 202/1697 (11.9%)  | 114/838 (13.6%) | 0.86 (0.67, 1.1)  | 0.85 (0.66, 1.09) |
