# Supplementary material for: Home Visits and the Use of Routine and Emergency Postpartum Care Among Low-Income People: A Secondary Analysis of a Randomized Clinical Trial
Source: PubMed Central journal article supplement (PMC11667346; doi:10.1001/jamanetworkopen.2024.51605), 2024-12-23
Supplement: jamanetwopen-e2451605-s003.pdf [file jamanetwopen-e2451605-s003.pdf]

## Data Sharing Statement

Rokicki. Home Visits and the Use of Routine and Emergency Postpartum Care Among Low-Income People. *JAMA Netw Open*. Published December 23, 2024.

doi:10.1001/jamanetworkopen.2024.51605

### Data

**Additional Information:** AEA RCT Registry:AEARCTR-0001039

Clinicaltrials.gov:NCT03360539

**Data available:** No

### Additional Information

**Explanation for why data not available:** Because of our data use agreements and consent processes, we are not able to publicly share trial data.
